# Supplementary material for: Modelling and rescuing neurodevelopmental defect of Down syndrome using induced pluripotent stem cells from monozygotic twins discordant for trisomy 21
Source: PubMed Central journal article supplement (PMC3927959; doi:10.1002/emmm.201302848), 2013-12-27
Supplement: emmm0006-0259-sd1.pdf [file emmm0006-0259-sd1.pdf]

# **Modelling and rescuing neurodevelopmental defect of Down syndrome using induced pluripotent stem cells derived from monozygotic twins discordant for trisomy 21**

Youssef Hibaoui, Iwona Grad, Audrey Letourneau, M. Reza Sailani, Sophie Dahoun, Federico A. Santoni, Stefania Gimelli, Michel Guipponi, Marie Françoise Pelte, Frédérique Béna, Stylianos E. Antonarakis and Anis Feki

## **SUPPORTING INFORMATION, TABLE OF CONTENT**

This section includes 5 Tables and 11 Figures.

**Supporting Information Table 1.** Summary of iPSC lines generated and used for the study.....page 3

**Supporting Information Table 2.** List of the differentially expressed genes between Twin-N-iPSCs and Twin-DS-iPSCs (see the EXCEL FILE and the R OBJECT FILE used to generate Fig 2E).....page 4

**Supporting Information Table 3.** Complete gene ontology (GO) categories of biological processes, cellular components, molecular functions and pathways in which significant differentially expressed genes were grouped.....page 5

**Supporting Information Table 4.** List of the antibodies used for immunocytochemistry.....page 10

**Supporting Information Table 5.** List of primers used in semi-quantitative and quantitative RT-PCR.....page 11

**Supporting Information Fig 1.** Additional controls validating the successful reprogramming and generation of Twin-N-iPSCs and Twin-DS-iPSCs.....page 12

**Supporting Information Fig 2.** Heat map and principal component analysis (PCA) plot and heat map of the normalized expression values in Twin-N-iPSCs and Twin-DS-iPSCs when analyzing the HSA21 genes only.....page 13

**Supporting Information Fig 3.** Heat map of the normalized gene expression values in Twin-DS-iPSCs and Twin-N-iPSCs for the 96 downregulated genes involved in brain-related functions.....page 15

**Supporting Information Fig 4.** Additional controls validating the absence of ectodermal structures observed in Twin-DS-iPSC-derived teratomas.....page 17

**Supporting Information Fig 5.** Proportion of each cell type in neurospheres derived from Twin-N-iPSCs and Twin-DS-iPSCs upon neural induction.....page 18

**Supporting Information Fig 6.** Proliferative properties of each cell type in neurospheres derived from Twin-N-iPSCs and Twin-DS-iPSCs upon neural induction.....page 19

**Supporting Information Fig 7.** Apoptotic properties of each cell type in neurospheres derived from Twin-N-iPSCs and Twin-DS-iPSCs upon neural induction.....page 20

**Supporting Information Fig 8.** Knockdown efficiencies of DYRK1A shRNA in NPCs derived from Twin-DS-iPSCs.....page 21

**Supporting Information Fig 9.** REVIGO interactive graph of the top biological processes associated with the 580 downregulated genes.....page 22

**Supporting Information Fig 10.** Additional effects of a delayed targeting of DYRK1A through EGCG treatment on neurons derived from Twin-DS-iPSCs.....page 23

**Supporting Information Fig 11.** Proposed mechanisms responsible for the abnormal neuronal differentiation of Twin-DS-iPSCs.....page 24
