# Supplementary material for: Modelling and rescuing neurodevelopmental defect of Down syndrome using induced pluripotent stem cells from monozygotic twins discordant for trisomy 21
Source: PubMed Central journal article supplement (PMC3927959; doi:10.1002/emmm.201302848), 2013-12-27
Supplement: emmm0006-0259-sd6.pdf [file emmm0006-0259-sd6.pdf]

| Category                                                                                  | Term                                                                 | Count | %    | P-value  | Benjamini |
|-------------------------------------------------------------------------------------------|----------------------------------------------------------------------|-------|------|----------|-----------|
| <i>GO categories of biological processes associated with the 580 downregulated genes:</i> |                                                                      |       |      |          |           |
| GO:0007275                                                                                | multicellular organismal development                                 | 189   | 33,6 | 1,10E-29 | 2,40E-26  |
| GO:0048731                                                                                | system development                                                   | 165   | 29,3 | 1,60E-28 | 1,70E-25  |
| GO:0032502                                                                                | developmental process                                                | 195   | 34,6 | 3,20E-27 | 2,30E-24  |
| GO:0048856                                                                                | anatomical structure development                                     | 170   | 30,2 | 6,20E-27 | 3,40E-24  |
| GO:0009653                                                                                | anatomical structure morphogenesis                                   | 103   | 18,3 | 8,20E-23 | 3,60E-20  |
| GO:0007399                                                                                | nervous system development                                           | 95    | 16,9 | 2,30E-21 | 8,20E-19  |
| GO:0048513                                                                                | organ development                                                    | 125   | 22,2 | 3,40E-21 | 1,00E-18  |
| GO:0032501                                                                                | multicellular organismal process                                     | 222   | 39,4 | 3,40E-21 | 9,30E-19  |
| GO:0030154                                                                                | cell differentiation                                                 | 117   | 20,8 | 1,70E-19 | 4,20E-17  |
| GO:0048869                                                                                | cellular developmental process                                       | 118   | 21   | 1,50E-18 | 3,30E-16  |
| GO:0007156                                                                                | homophilic cell adhesion                                             | 30    | 5,3  | 1,80E-17 | 3,60E-15  |
| GO:0022610                                                                                | biological adhesion                                                  | 68    | 12,1 | 1,90E-17 | 3,40E-15  |
| GO:0007155                                                                                | cell adhesion                                                        | 67    | 11,9 | 6,60E-17 | 1,90E-14  |
| GO:0016337                                                                                | cell-cell adhesion                                                   | 41    | 7,3  | 9,70E-17 | 1,70E-14  |
| GO:0009887                                                                                | organ morphogenesis                                                  | 54    | 9,6  | 1,50E-13 | 2,20E-11  |
| GO:0007389                                                                                | pattern specification process                                        | 36    | 6,4  | 2,20E-13 | 3,00E-11  |
| GO:0009888                                                                                | tissue development                                                   | 59    | 10,5 | 2,40E-13 | 3,10E-11  |
| GO:0001501                                                                                | skeletal system development                                          | 39    | 6,9  | 4,20E-13 | 5,10E-11  |
| GO:0009790                                                                                | embryonic development                                                | 53    | 9,4  | 7,50E-13 | 8,50E-11  |
| GO:0048598                                                                                | embryonic morphogenesis                                              | 37    | 6,6  | 2,90E-12 | 3,10E-10  |
| GO:0022008                                                                                | neurogenesis                                                         | 52    | 9,2  | 2,20E-11 | 2,30E-09  |
| GO:0043009                                                                                | chordate embryonic development                                       | 37    | 6,6  | 2,60E-11 | 2,60E-09  |
| GO:0009792                                                                                | embryonic development ending in birth or egg hatching                | 37    | 6,6  | 3,40E-11 | 3,20E-09  |
| GO:0048699                                                                                | generation of neurons                                                | 48    | 8,5  | 1,90E-10 | 1,80E-08  |
| GO:0006357                                                                                | regulation of transcription from RNA polymerase II promoter          | 56    | 9,9  | 2,70E-10 | 2,40E-08  |
| GO:0050793                                                                                | regulation of developmental process                                  | 52    | 9,2  | 1,30E-09 | 1,10E-07  |
| GO:0051239                                                                                | regulation of multicellular organismal process                       | 63    | 11,2 | 3,80E-09 | 3,10E-07  |
| GO:0030182                                                                                | neuron differentiation                                               | 39    | 6,9  | 5,10E-09 | 3,90E-07  |
| GO:0045893                                                                                | positive regulation of transcription, DNA-dependent                  | 41    | 7,3  | 5,20E-09 | 3,90E-07  |
| GO:0060429                                                                                | epithelium development                                               | 27    | 4,8  | 5,60E-09 | 4,00E-07  |
| GO:0003002                                                                                | regionalization                                                      | 25    | 4,4  | 6,40E-09 | 4,50E-07  |
| GO:0010628                                                                                | positive regulation of gene expression                               | 46    | 8,2  | 6,50E-09 | 4,40E-07  |
| GO:0051254                                                                                | positive regulation of RNA metabolic process                         | 41    | 7,3  | 6,60E-09 | 4,30E-07  |
| GO:0007417                                                                                | central nervous system development                                   | 38    | 6,7  | 7,40E-09 | 4,70E-07  |
| GO:0045944                                                                                | positive regulation of transcription from RNA polymerase II promoter | 35    | 6,2  | 8,60E-09 | 5,30E-07  |
| GO:0048568                                                                                | embryonic organ development                                          | 23    | 4,1  | 1,10E-08 | 6,80E-07  |
| GO:0035295                                                                                | tube development                                                     | 26    | 4,6  | 1,30E-08 | 7,60E-07  |
| GO:0048562                                                                                | embryonic organ morphogenesis                                        | 20    | 3,6  | 1,80E-08 | 1,10E-06  |
| GO:0051216                                                                                | cartilage development                                                | 15    | 2,7  | 3,80E-08 | 2,10E-06  |
| GO:0045595                                                                                | regulation of cell differentiation                                   | 40    | 7,1  | 3,80E-08 | 2,10E-06  |
| GO:0048518                                                                                | positive regulation of biological process                            | 104   | 18,5 | 4,30E-08 | 2,30E-06  |
| GO:0035239                                                                                | tube morphogenesis                                                   | 19    | 3,4  | 5,00E-08 | 2,60E-06  |
| GO:0045941                                                                                | positive regulation of transcription                                 | 43    | 7,6  | 6,50E-08 | 3,30E-06  |
| GO:0048468                                                                                | cell development                                                     | 46    | 8,2  | 1,40E-07 | 6,90E-06  |
| GO:0000122                                                                                | negative regulation of transcription from RNA polymerase II promoter | 27    | 4,8  | 1,50E-07 | 7,00E-06  |
| GO:0048522                                                                                | positive regulation of cellular process                              | 94    | 16,7 | 3,20E-07 | 1,50E-05  |
| GO:0010557                                                                                | positive regulation of macromolecule biosynthetic process            | 45    | 8    | 5,60E-07 | 2,60E-05  |
| GO:0042471                                                                                | ear morphogenesis                                                    | 13    | 2,3  | 5,60E-07 | 2,60E-05  |
| GO:0001944                                                                                | vasculature development                                              | 25    | 4,4  | 6,60E-07 | 2,90E-05  |
| GO:0006355                                                                                | regulation of transcription, DNA-dependent                           | 90    | 16   | 7,20E-07 | 3,10E-05  |
| GO:0007422                                                                                | peripheral nervous system development                                | 10    | 1,8  | 8,90E-07 | 3,80E-05  |

| Category                                                                                              | Term                                                                                         | Count | %    | P-value  | Benjamini |
|-------------------------------------------------------------------------------------------------------|----------------------------------------------------------------------------------------------|-------|------|----------|-----------|
| <i>GO categories of biological processes associated with the 580 downregulated genes (continued):</i> |                                                                                              |       |      |          |           |
| GO:0045165                                                                                            | cell fate commitment                                                                         | 18    | 3,2  | 1,00E-06 | 4,20E-05  |
| GO:0045935                                                                                            | positive regulation of nucleobase, nucleoside, nucleotide and nucleic acid metabolic process | 43    | 7,6  | 1,00E-06 | 4,10E-05  |
| GO:0048646                                                                                            | anatomical structure formation involved in morphogenesis                                     | 30    | 5,3  | 1,00E-06 | 4,20E-05  |
| GO:0045892                                                                                            | negative regulation of transcription, DNA-dependent                                          | 30    | 5,3  | 1,30E-06 | 5,20E-05  |
| GO:0010468                                                                                            | regulation of gene expression                                                                | 128   | 22,7 | 1,40E-06 | 5,30E-05  |
| GO:0016481                                                                                            | negative regulation of transcription                                                         | 35    | 6,2  | 1,40E-06 | 5,30E-05  |
| GO:0000904                                                                                            | cell morphogenesis involved in differentiation                                               | 24    | 4,3  | 1,40E-06 | 5,40E-05  |
| GO:0001568                                                                                            | blood vessel development                                                                     | 24    | 4,3  | 1,60E-06 | 5,70E-05  |
| GO:0010629                                                                                            | negative regulation of gene expression                                                       | 37    | 6,6  | 1,60E-06 | 5,80E-05  |
| GO:0007409                                                                                            | axonogenesis                                                                                 | 21    | 3,7  | 1,60E-06 | 5,80E-05  |
| GO:0051253                                                                                            | negative regulation of RNA metabolic process                                                 | 30    | 5,3  | 1,80E-06 | 6,40E-05  |
| GO:0051252                                                                                            | regulation of RNA metabolic process                                                          | 90    | 16   | 1,90E-06 | 6,40E-05  |
| GO:0001763                                                                                            | morphogenesis of a branching structure                                                       | 13    | 2,3  | 2,00E-06 | 6,90E-05  |
| GO:0051173                                                                                            | positive regulation of nitrogen compound metabolic process                                   | 43    | 7,6  | 2,30E-06 | 7,60E-05  |
| GO:0007420                                                                                            | brain development                                                                            | 26    | 4,6  | 2,40E-06 | 8,00E-05  |
| GO:0045449                                                                                            | regulation of transcription                                                                  | 118   | 21   | 2,50E-06 | 8,00E-05  |
| GO:0010604                                                                                            | positive regulation of macromolecule metabolic process                                       | 52    | 9,2  | 2,60E-06 | 8,40E-05  |
| GO:0009891                                                                                            | positive regulation of biosynthetic process                                                  | 45    | 8    | 2,80E-06 | 8,80E-05  |
| GO:0019219                                                                                            | regulation of nucleobase, nucleoside, nucleotide and nucleic acid metabolic process          | 125   | 22,2 | 3,10E-06 | 9,70E-05  |
| GO:0031328                                                                                            | positive regulation of cellular biosynthetic process                                         | 44    | 7,8  | 4,60E-06 | 1,40E-04  |
| GO:0051171                                                                                            | regulation of nitrogen compound metabolic process                                            | 125   | 22,2 | 4,90E-06 | 1,50E-04  |
| GO:0043583                                                                                            | ear development                                                                              | 14    | 2,5  | 5,40E-06 | 1,60E-04  |
| GO:0048667                                                                                            | cell morphogenesis involved in neuron differentiation                                        | 21    | 3,7  | 5,60E-06 | 1,60E-04  |
| GO:0051960                                                                                            | regulation of nervous system development                                                     | 20    | 3,6  | 5,90E-06 | 1,70E-04  |
| GO:0042472                                                                                            | inner ear morphogenesis                                                                      | 11    | 2    | 5,90E-06 | 1,70E-04  |
| GO:0045934                                                                                            | negative regulation of nucleobase, nucleoside, nucleotide and nucleic acid metabolic process | 36    | 6,4  | 6,00E-06 | 1,70E-04  |
| GO:0065007                                                                                            | biological regulation                                                                        | 272   | 48,3 | 6,10E-06 | 1,70E-04  |
| GO:0048514                                                                                            | blood vessel morphogenesis                                                                   | 21    | 3,7  | 6,40E-06 | 1,80E-04  |
| GO:0048812                                                                                            | neuron projection morphogenesis                                                              | 21    | 3,7  | 7,40E-06 | 2,00E-04  |
| GO:0010810                                                                                            | regulation of cell-substrate adhesion                                                        | 10    | 1,8  | 7,90E-06 | 2,10E-04  |
| GO:0006928                                                                                            | cell motion                                                                                  | 34    | 6    | 8,00E-06 | 2,10E-04  |
| GO:0051172                                                                                            | negative regulation of nitrogen compound metabolic process                                   | 36    | 6,4  | 8,10E-06 | 2,10E-04  |
| GO:0045785                                                                                            | positive regulation of cell adhesion                                                         | 11    | 2    | 1,10E-05 | 2,90E-04  |
| GO:0000902                                                                                            | cell morphogenesis                                                                           | 28    | 5    | 1,10E-05 | 2,90E-04  |
| GO:0010811                                                                                            | positive regulation of cell-substrate adhesion                                               | 8     | 1,4  | 1,50E-05 | 3,80E-04  |
| GO:0030155                                                                                            | regulation of cell adhesion                                                                  | 16    | 2,8  | 1,70E-05 | 4,20E-04  |
| GO:0030855                                                                                            | epithelial cell differentiation                                                              | 16    | 2,8  | 1,70E-05 | 4,20E-04  |
| GO:0031327                                                                                            | negative regulation of cellular biosynthetic process                                         | 37    | 6,6  | 1,80E-05 | 4,40E-04  |
| GO:0048858                                                                                            | cell projection morphogenesis                                                                | 22    | 3,9  | 1,80E-05 | 4,40E-04  |
| GO:0048706                                                                                            | embryonic skeletal system development                                                        | 12    | 2,1  | 1,90E-05 | 4,60E-04  |
| GO:0031326                                                                                            | regulation of cellular biosynthetic process                                                  | 126   | 22,4 | 1,90E-05 | 4,60E-04  |
| GO:0009893                                                                                            | positive regulation of metabolic process                                                     | 52    | 9,2  | 1,90E-05 | 4,60E-04  |
| GO:0007411                                                                                            | axon guidance                                                                                | 14    | 2,5  | 2,00E-05 | 4,70E-04  |
| GO:0060348                                                                                            | bone development                                                                             | 15    | 2,7  | 2,10E-05 | 4,80E-04  |
| GO:0050789                                                                                            | regulation of biological process                                                             | 258   | 45,8 | 2,10E-05 | 4,80E-04  |
| GO:0009952                                                                                            | anterior/posterior pattern formation                                                         | 16    | 2,8  | 2,20E-05 | 5,00E-04  |
| GO:0048754                                                                                            | branching morphogenesis of a tube                                                            | 11    | 2    | 2,30E-05 | 5,20E-04  |
| GO:0048839                                                                                            | inner ear development                                                                        | 12    | 2,1  | 2,40E-05 | 5,40E-04  |
| GO:0010558                                                                                            | negative regulation of macromolecule biosynthetic process                                    | 36    | 6,4  | 2,40E-05 | 5,40E-04  |
| GO:0031325                                                                                            | positive regulation of cellular metabolic process                                            | 50    | 8,9  | 2,50E-05 | 5,40E-04  |

| Category                                                                                              | Term                                                   | Count | %    | P-value  | Benjamini |
|-------------------------------------------------------------------------------------------------------|--------------------------------------------------------|-------|------|----------|-----------|
| <i>GO categories of biological processes associated with the 580 downregulated genes (continued):</i> |                                                        |       |      |          |           |
| GO:0060255                                                                                            | regulation of macromolecule metabolic process          | 136   | 24,2 | 2,50E-05 | 5,50E-04  |
| GO:0009889                                                                                            | regulation of biosynthetic process                     | 126   | 22,4 | 2,60E-05 | 5,60E-04  |
| GO:0019222                                                                                            | regulation of metabolic process                        | 148   | 26,3 | 2,60E-05 | 5,60E-04  |
| GO:0009890                                                                                            | negative regulation of biosynthetic process            | 37    | 6,6  | 2,70E-05 | 5,70E-04  |
| GO:0007507                                                                                            | heart development                                      | 20    | 3,6  | 2,90E-05 | 6,10E-04  |
| GO:0032989                                                                                            | cellular component morphogenesis                       | 29    | 5,2  | 3,00E-05 | 6,10E-04  |
| GO:0048705                                                                                            | skeletal system morphogenesis                          | 14    | 2,5  | 3,30E-05 | 6,70E-04  |
| GO:0048729                                                                                            | tissue morphogenesis                                   | 18    | 3,2  | 3,30E-05 | 6,70E-04  |
| GO:0032990                                                                                            | cell part morphogenesis                                | 22    | 3,9  | 3,50E-05 | 6,90E-04  |
| GO:0021915                                                                                            | neural tube development                                | 11    | 2    | 3,50E-05 | 6,90E-04  |
| GO:0048666                                                                                            | neuron development                                     | 26    | 4,6  | 3,80E-05 | 7,50E-04  |
| GO:0001503                                                                                            | ossification                                           | 14    | 2,5  | 4,40E-05 | 8,50E-04  |
| GO:0050767                                                                                            | regulation of neurogenesis                             | 17    | 3    | 4,40E-05 | 8,40E-04  |
| GO:0048523                                                                                            | negative regulation of cellular process                | 79    | 14   | 4,40E-05 | 8,40E-04  |
| GO:0014032                                                                                            | neural crest cell differentiation                      | 8     | 1,4  | 4,80E-05 | 9,00E-04  |
| GO:0014033                                                                                            | neural crest cell development                          | 8     | 1,4  | 4,80E-05 | 9,00E-04  |
| GO:0048704                                                                                            | embryonic skeletal system morphogenesis                | 10    | 1,8  | 4,80E-05 | 9,10E-04  |
| GO:0045664                                                                                            | regulation of neuron differentiation                   | 15    | 2,7  | 5,00E-05 | 9,30E-04  |
| GO:0060284                                                                                            | regulation of cell development                         | 19    | 3,4  | 5,20E-05 | 9,50E-04  |
| GO:0002009                                                                                            | morphogenesis of an epithelium                         | 13    | 2,3  | 5,30E-05 | 9,60E-04  |
| GO:0050794                                                                                            | regulation of cellular process                         | 247   | 43,9 | 5,70E-05 | 1,00E-03  |
| GO:0010556                                                                                            | regulation of macromolecule biosynthetic process       | 119   | 21,1 | 8,00E-05 | 1,40E-03  |
| GO:0031175                                                                                            | neuron projection development                          | 21    | 3,7  | 1,00E-04 | 1,90E-03  |
| GO:0030278                                                                                            | regulation of ossification                             | 11    | 2    | 1,20E-04 | 2,00E-03  |
| GO:0051093                                                                                            | negative regulation of developmental process           | 21    | 3,7  | 1,20E-04 | 2,10E-03  |
| GO:0048762                                                                                            | mesenchymal cell development                           | 9     | 1,6  | 1,30E-04 | 2,30E-03  |
| GO:0014031                                                                                            | mesenchymal cell differentiation                       | 9     | 1,6  | 1,30E-04 | 2,30E-03  |
| GO:0060485                                                                                            | mesenchyme development                                 | 9     | 1,6  | 1,50E-04 | 2,60E-03  |
| GO:0080090                                                                                            | regulation of primary metabolic process                | 133   | 23,6 | 1,50E-04 | 2,60E-03  |
| GO:0001525                                                                                            | angiogenesis                                           | 15    | 2,7  | 1,60E-04 | 2,70E-03  |
| GO:0031323                                                                                            | regulation of cellular metabolic process               | 138   | 24,5 | 2,10E-04 | 3,50E-03  |
| GO:0030900                                                                                            | forebrain development                                  | 15    | 2,7  | 2,10E-04 | 3,50E-03  |
| GO:0007423                                                                                            | sensory organ development                              | 19    | 3,4  | 2,10E-04 | 3,50E-03  |
| GO:0010605                                                                                            | negative regulation of macromolecule metabolic process | 41    | 7,3  | 2,30E-04 | 3,80E-03  |
| GO:0001843                                                                                            | neural tube closure                                    | 7     | 1,2  | 2,40E-04 | 3,90E-03  |
| GO:0060606                                                                                            | tube closure                                           | 7     | 1,2  | 2,40E-04 | 3,90E-03  |
| GO:0042127                                                                                            | regulation of cell proliferation                       | 43    | 7,6  | 2,40E-04 | 4,00E-03  |
| GO:0016477                                                                                            | cell migration                                         | 21    | 3,7  | 2,90E-04 | 4,60E-03  |
| GO:0031324                                                                                            | negative regulation of cellular metabolic process      | 40    | 7,1  | 3,10E-04 | 4,90E-03  |
| GO:0045596                                                                                            | negative regulation of cell differentiation            | 18    | 3,2  | 3,10E-04 | 4,90E-03  |
| GO:0051094                                                                                            | positive regulation of developmental process           | 21    | 3,7  | 3,10E-04 | 4,90E-03  |
| GO:0010646                                                                                            | regulation of cell communication                       | 52    | 9,2  | 3,80E-04 | 6,00E-03  |
| GO:0009892                                                                                            | negative regulation of metabolic process               | 42    | 7,5  | 4,00E-04 | 6,20E-03  |
| GO:0014020                                                                                            | primary neural tube formation                          | 7     | 1,2  | 4,10E-04 | 6,30E-03  |
| GO:0009953                                                                                            | dorsal/ventral pattern formation                       | 9     | 1,6  | 4,20E-04 | 6,50E-03  |
| GO:0007157                                                                                            | heterophilic cell adhesion                             | 6     | 1,1  | 4,30E-04 | 6,40E-03  |
| GO:0030111                                                                                            | regulation of Wnt receptor signaling pathway           | 8     | 1,4  | 4,30E-04 | 6,40E-03  |
| GO:0048519                                                                                            | negative regulation of biological process              | 80    | 14,2 | 4,40E-04 | 6,60E-03  |
| GO:0001755                                                                                            | neural crest cell migration                            | 6     | 1,1  | 5,30E-04 | 7,90E-03  |

| Category | Term | Count | % | P-value | Benjamini |
|----------|------|-------|---|---------|-----------|
|----------|------|-------|---|---------|-----------|

***GO categories of cellular components associated with the 580 downregulated genes:***

|            |                                    |     |      |          |          |
|------------|------------------------------------|-----|------|----------|----------|
| GO:0044421 | extracellular region part          | 60  | 10,7 | 5,70E-08 | 1,70E-05 |
| GO:0005578 | proteinaceous extracellular matrix | 28  | 5    | 9,40E-07 | 1,40E-04 |
| GO:0031012 | extracellular matrix               | 29  | 5,2  | 1,30E-06 | 1,30E-04 |
| GO:0044420 | extracellular matrix part          | 15  | 2,7  | 8,60E-06 | 6,60E-04 |
| GO:0005576 | extracellular region               | 92  | 16,3 | 1,50E-05 | 9,00E-04 |
| GO:0005886 | plasma membrane                    | 149 | 26,5 | 4,90E-05 | 2,50E-03 |
| GO:0005581 | collagen                           | 8   | 1,4  | 6,00E-05 | 2,60E-03 |

***GO categories of molecular components associated with the 580 downregulated genes:***

|            |                                  |     |      |          |          |
|------------|----------------------------------|-----|------|----------|----------|
| GO:0003700 | transcription factor activity    | 65  | 11,5 | 4,10E-09 | 2,30E-06 |
| GO:0043565 | sequence-specific DNA binding    | 45  | 8    | 8,70E-08 | 2,50E-05 |
| GO:0005509 | calcium ion binding              | 57  | 10,1 | 5,10E-07 | 9,60E-05 |
| GO:0030528 | transcription regulator activity | 80  | 14,2 | 1,10E-06 | 1,50E-04 |
| GO:0005488 | binding                          | 416 | 73,9 | 5,60E-06 | 6,30E-04 |
| GO:0003677 | DNA binding                      | 104 | 18,5 | 4,10E-05 | 3,80E-03 |
| GO:0005515 | protein binding                  | 290 | 51,5 | 6,00E-05 | 4,80E-03 |

***GO categories of pathways associated with the 580 downregulated genes:***

|           |                            |    |     |          |          |
|-----------|----------------------------|----|-----|----------|----------|
| hsa05200: | Pathways in cancer         | 25 | 4,4 | 3,40E-06 | 3,70E-04 |
| hsa04310: | Wnt signaling pathway      | 15 | 2,7 | 3,60E-05 | 2,00E-03 |
| hsa04360: | Axon guidance              | 11 | 0,2 | 2,00E-03 | 5,20E-02 |
| P00012:   | Cadherin signaling pathway | 35 | 6,2 | 7,10E-17 | 6,60E-15 |
| P00057:   | Wnt signaling pathway      | 41 | 7,3 | 9,50E-11 | 2,80E-09 |

| Category                                                                                | Term                                                                                | Count | %   | P-value  | Benjamini |
|-----------------------------------------------------------------------------------------|-------------------------------------------------------------------------------------|-------|-----|----------|-----------|
| <b>GO categories of biological processes associated with the 624 upregulated genes:</b> |                                                                                     |       |     |          |           |
| GO:0051252                                                                              | regulation of RNA metabolic process                                                 | 106   | 2,1 | 2,40E-09 | 5,60E-06  |
| GO:0006355                                                                              | regulation of transcription, DNA-dependent                                          | 104   | 2,1 | 3,10E-09 | 3,60E-06  |
| GO:0006350                                                                              | transcription                                                                       | 117   | 2,4 | 4,60E-09 | 3,60E-06  |
| GO:0009058                                                                              | biosynthetic process                                                                | 169   | 3,4 | 4,20E-08 | 2,40E-05  |
| GO:0044249                                                                              | cellular biosynthetic process                                                       | 165   | 3,3 | 5,00E-08 | 2,30E-05  |
| GO:0009059                                                                              | macromolecule biosynthetic process                                                  | 140   | 2,8 | 1,60E-07 | 6,30E-05  |
| GO:0045449                                                                              | regulation of transcription                                                         | 131   | 2,6 | 1,80E-07 | 5,90E-05  |
| GO:0034645                                                                              | cellular macromolecule biosynthetic process                                         | 139   | 2,8 | 1,80E-07 | 5,30E-05  |
| GO:0051171                                                                              | regulation of nitrogen compound metabolic process                                   | 139   | 2,8 | 3,30E-07 | 8,60E-05  |
| GO:0019219                                                                              | regulation of nucleobase, nucleoside, nucleotide and nucleic acid metabolic process | 138   | 2,8 | 3,50E-07 | 8,00E-05  |
| GO:0010468                                                                              | regulation of gene expression                                                       | 138   | 2,8 | 8,20E-07 | 1,70E-04  |
| GO:0010556                                                                              | regulation of macromolecule biosynthetic process                                    | 136   | 2,7 | 1,40E-06 | 2,70E-04  |
| GO:0080090                                                                              | regulation of primary metabolic process                                             | 153   | 3,1 | 1,50E-06 | 2,70E-04  |
| GO:0031326                                                                              | regulation of cellular biosynthetic process                                         | 140   | 2,8 | 1,70E-06 | 2,80E-04  |
| GO:0009889                                                                              | regulation of biosynthetic process                                                  | 140   | 2,8 | 2,50E-06 | 3,90E-04  |
| GO:0060255                                                                              | regulation of macromolecule metabolic process                                       | 149   | 3   | 6,20E-06 | 8,90E-04  |
| GO:0031323                                                                              | regulation of cellular metabolic process                                            | 156   | 3,1 | 7,80E-06 | 1,10E-03  |
| GO:0010467                                                                              | gene expression                                                                     | 138   | 2,8 | 1,20E-05 | 1,60E-03  |
| GO:0019222                                                                              | regulation of metabolic process                                                     | 158   | 3,2 | 4,00E-05 | 4,90E-03  |
| GO:0006807                                                                              | nitrogen compound metabolic process                                                 | 162   | 3,3 | 7,80E-05 | 9,00E-03  |
| <b>GO categories of molecular components associated with the 624 upregulated genes:</b> |                                                                                     |       |     |          |           |
| GO:0008270                                                                              | zinc ion binding                                                                    | 124   | 2,5 | 3,40E-09 | 2,30E-06  |
| GO:0046914                                                                              | transition metal ion binding                                                        | 137   | 2,8 | 9,40E-08 | 3,10E-05  |
| GO:0046872                                                                              | metal ion binding                                                                   | 184   | 3,7 | 3,10E-07 | 7,00E-05  |
| GO:0043169                                                                              | cation binding                                                                      | 185   | 3,7 | 3,80E-07 | 6,40E-05  |
| GO:0043167                                                                              | ion binding                                                                         | 187   | 3,8 | 4,10E-07 | 5,60E-05  |
| GO:0003677                                                                              | DNA binding                                                                         | 113   | 2,3 | 4,30E-06 | 4,80E-04  |

**Supporting Information Table 3. Complete gene ontology (GO) categories of biological processes, cellular components, molecular functions and pathways in which significant differentially expressed genes were grouped.**

The table lists the biological processes that might be affected due to trisomy 21, GO categories are ranked by p-values and Benjamini-corrected p-values given by DAVID. The number of genes differentially expressed in each category is also shown.
