# Supplementary material for: Modelling and rescuing neurodevelopmental defect of Down syndrome using induced pluripotent stem cells from monozygotic twins discordant for trisomy 21
Source: PubMed Central journal article supplement (PMC3927959; doi:10.1002/emmm.201302848), 2013-12-27
Supplement: emmm0006-0259-sd7.pdf [file emmm0006-0259-sd7.pdf]

| <b>Antibodies</b> | <b>Clone</b>            | <b>ID</b> | <b>Source</b>          |
|-------------------|-------------------------|-----------|------------------------|
| OCT-3/4           | C-10 mouse monoclonal   | Sc-5279   | Santa Cruz             |
| SOX2              | Y-17 goat polyclonal    | Sc-17320  | Santa Cruz             |
| NANOG             | H-155 rabbit polyclonal | Sc-33759  | Santa Cruz             |
| SSEA-4            | 813-70 mouse monoclonal | Sc-21704  | Santa Cruz             |
| TRA1-60           | Mouse monoclonal        | Sc-21705  | Santa Cruz             |
| TRA1-80           | Mouse monoclonal        | Sc-21706  | Santa Cruz             |
| $\alpha$ -SMA     | HHF35 mouse monoclonal  | Sc-53014  | Santa Cruz             |
| AFP               | C3 mouse monoclonal     | Sc-8399   | Santa Cruz             |
| $\beta$ 3-TUBULIN | TU-20 mouse monoclonal  | Sc-51670  | Santa Cruz             |
| $\beta$ 3-TUBULIN | Rabbit polyclonal       | PRB-435P  | Covance                |
| MAP2              | Rabbit polyclonal       | AB5622    | Millipore              |
| NESTIN            | Rabbit polyclonal       | AB5922    | Millipore              |
| GFAP              | Rabbit polyclonal       | Z0334     | Dako                   |
| OLIG2             | C-17 goat polyclonal    | Sc-19969  | Santa Cruz             |
| Ki-67-FITC        | Rabbit monoclonal       | ab27619   | Abcam                  |
| KI-67             | Mouse monoclonal        | Sc-23900  | Santa Cruz             |
| Cleaved caspase-3 | Mouse monoclonal        | AB10753   | Millipore              |
| SYNAPSIN          | Rabbit polyclonal       | AB1543    | Millipore              |
| GAD67             | Mouse monoclonal        | MAB5406   | Chemicon International |
| PSD95             | Goat polyclonal         | Ab12093   | Abcam                  |

**Supporting Information Table 4. List of the antibodies used for immunocytochemistry.**
