# Supplementary material for: Modelling and rescuing neurodevelopmental defect of Down syndrome using induced pluripotent stem cells from monozygotic twins discordant for trisomy 21
Source: PubMed Central journal article supplement (PMC3927959; doi:10.1002/emmm.201302848), 2013-12-27
Supplement: emmm0006-0259-sd8.pdf [file emmm0006-0259-sd8.pdf]

### Semi-quantitative RT-PCR

| Gene             | Forward               | Reverse                | Amplicon |
|------------------|-----------------------|------------------------|----------|
| <i>GAPDH</i>     | AGCCACATCGCTCAGACACC  | GTA CT CAGCGGCCAGCATCG | 174      |
| <i>OCT4 endo</i> | GCCTTCCTTCCCCATGGC    | CCTCAA AATCCTCTCGTTGT  | 911      |
| <i>OCT4 exo</i>  | TCAAGCCTCAGACAGTGGTTC | CCTCAA AATCCTCTCGTTGT  | 976      |

### Quantitative RT-PCR

| Gene             | Forward                    | Reverse                      |
|------------------|----------------------------|------------------------------|
| <i>AFP</i>       | TTGACTGCAATTGAGAAACCCA     | AAGGCAGGTAGCTGGTTTTCTAAA     |
| <i>T</i>         | TGCTTCCCTGAGACCCAGTT       | GATCACTTCTTTCCTTTGCATCAAG    |
| <i>TUBB3</i>     | CGGTGGTGGAAACCCTACAAC      | AGGTGGTGACTCCGCTCAT          |
| <i>DLI1</i>      | ATATGCCCAACGAATGCTG        | GCTCGGTCTGAACTCGGTTTC        |
| <i>DYRK1A</i>    | CCTCTGTTCAAGTGGTGCC        | CCGTTTTCCATCTTTGGTC          |
| <i>eEF1</i>      | AGCAAAAATGACCCACCAATG      | GGCCTGGATGGTTCAGGATA         |
| <i>FOXA2</i>     | GGAGCGGTGAAGATGGAAG        | TACGTGTTTCATGCCGTTTCAT       |
| <i>GATA4</i>     | CTGGCCTGTCATCTCACTACG      | GGTCCGTCAGGAATTTGAGG         |
| <i>GFAP</i>      | AAGAGATCCGCACGCAGTAT       | AGGTCAAGGACTGCAACTGG         |
| <i>GUSB</i>      | GAAGTATCAGAAGCCCATTATTCAGA | CAGAGGTGGATCCTGGTGAAA        |
| <i>HES1</i>      | AACACTGATTTTGATGCTCTGAAG   | CATTTCCAGAATGTCCGCCTT        |
| <i>LIN28</i>     | TGTAAGTGGTTCAACGTGCG       | CCTCACCTCCTTCAAGCTC          |
| <i>MAP2</i>      | AAAGCTGATGAGGGCAAGAA       | GGCCCCTGAATAAATTCCAT         |
| <i>NANOG</i>     | GATTTGTGGGCCTGAAGAAA       | TTGGGACTGGTGGGAAGAATC        |
| <i>NES</i>       | GGAAGAGAACCTGGGAAAGG       | CTTGGTCTTCTCCACCGTA          |
| <i>NOTCH1</i>    | CGGGTCCACCAGTTTGAATG       | GTTGTATTGGTTCGGCACCAT        |
| <i>NOTCH2</i>    | TCTGCCCTTGACCCATTT         | GGTACGCTGTGGTCCACAGAG        |
| <i>OCT4</i>      | AGTGCCCGAAACCCACACTG       | ACCACACTCGGACCACATCCT        |
| <i>OLIG1</i>     | AAGTGACCAGAGCGGATGTTTCGAT  | TGAGAGCGAGCACTTCTGCCTAA      |
| <i>OLIG2</i>     | GGACAAGCTAGGAGGCAGTG       | ATGGCGATGTTGAGGTCGTG         |
| <i>PSD95</i>     | ACAAGCGGATCACAGAGGAG       | CAGATGTAGGGGCTGAGAG          |
| <i>REST/NRSF</i> | GAGGAGGAGGGCTGTTTACC       | TCACAGCAGCTGCCATTTAC         |
| <i>REX1</i>      | GAAGAGGCCTTCACTCTAGTAGTG   | TTTCTGGTGTCTTGTCTTTGCCCG     |
| <i>S100B</i>     | CATCGACGTTTTCCACCAATA      | TCGTGGCAGCGAGTAGTAAC         |
| <i>SMA</i>       | AATACTCTGTCTGGATCGGTGGCT   | ACGAGTCAGAGCTTTGGCTAGGAA     |
| <i>SNAP25</i>    | CGATACACAGAATCGCCAGA       | CAGCATCTTTGTTGCACGTT         |
| <i>SOX2</i>      | GCGAACCATCTCTGTGGTCT       | GGAAAGTTGGGATCGAACAA         |
| <i>SYN1</i>      | GCAAAATACTTCAAAGGGAAAAAGA  | TCTACTTTAATGTCAATTTCTCCATGGA |
| <i>VIM</i>       | GAACGCCAGATGCGTGAAATG      | CCAGAGGGAGTGAATCCAGATTA      |
| <i>WNT7A</i>     | AAGGTCTTTGTGGATGCCC        | GCACTTACATTCCAGCTTCATG       |
| <i>WNT7B</i>     | TATCCAGAGAGCAAAGTG         | TGTGTTAGTGCCGAGAATC          |

Supporting Information Table 5. List of primers used in semi-quantitative and quantitative RT-PCR.
