# Supplementary material for: Modelling and rescuing neurodevelopmental defect of Down syndrome using induced pluripotent stem cells from monozygotic twins discordant for trisomy 21
Source: PubMed Central journal article supplement (PMC3927959; doi:10.1002/emmm.201302848), 2013-12-27
Supplement: emmm0006-0259-sd11.pdf [file emmm0006-0259-sd11.pdf]

A

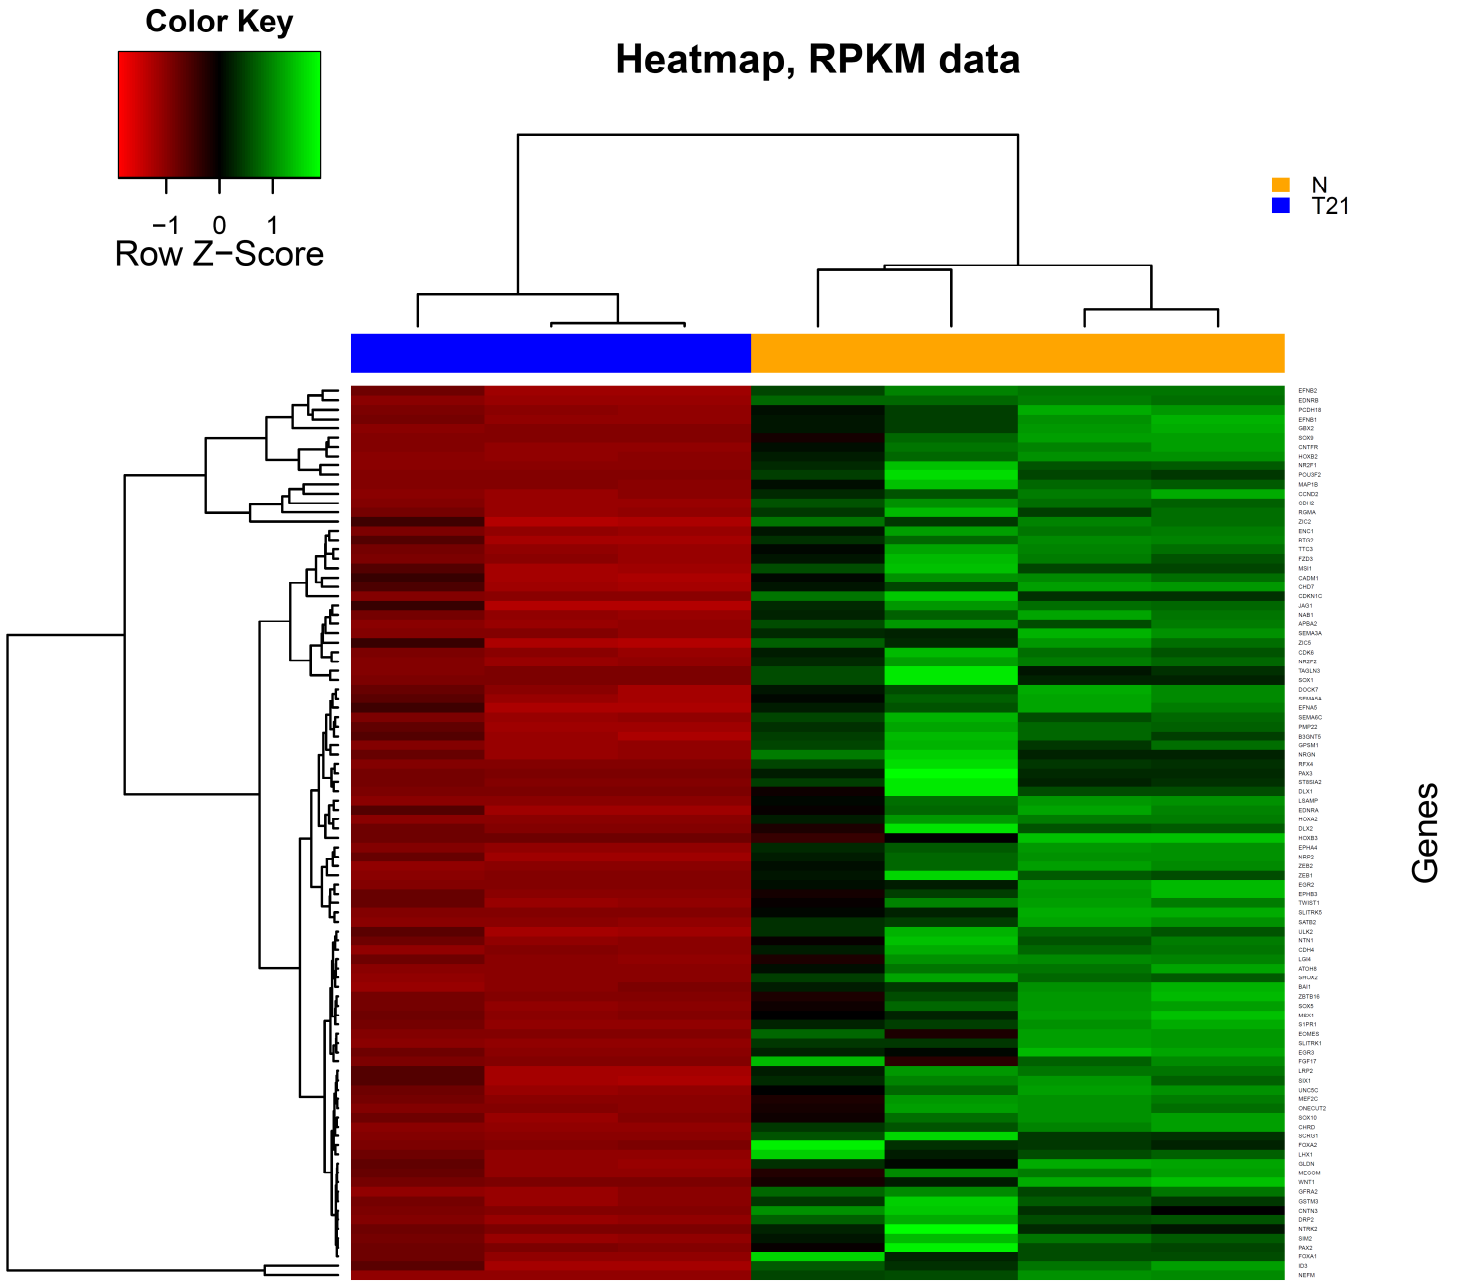

**B**

| Categories                                                         | Genes in the network                                                                                                                                                                                                                                                                                                                                                                                                                                                                                                                                                                                                                                         | Count | P-value  | Benjamini |
|--------------------------------------------------------------------|--------------------------------------------------------------------------------------------------------------------------------------------------------------------------------------------------------------------------------------------------------------------------------------------------------------------------------------------------------------------------------------------------------------------------------------------------------------------------------------------------------------------------------------------------------------------------------------------------------------------------------------------------------------|-------|----------|-----------|
| Nervous system development (GO:0007399)                            | NRP2, MEF2C, FOXA2, GLDN, CADM1, FGF17, ZEB2, ZEB1, PAX3, JAG1, PAX2, ZIC2, EDNRB, WNT1, GSTM3, S1PR1, SCRG1, LGI4, ATOH8, SEMA3A, UNC5C, NR2F2, NR2F1, TWIST1, SOX10, SATB2, EGR3, EGR2, EFN1, EN1, EFN2, EOMES, CDK6, MECOM, SLITRK1, MSX1, BTG2, CCND2, LSAMP, NAB1, SIX1, EFNA5, CNTN3, NRG1, PMP22, SLITRK5, SOX1, ONECUT2, SOX5, CNTFR, CDH2, ZBTB16, ST8SIA2, EPHB3, TAGLN3, CDH4, TTC3, SEMA5A, RGMA, HOXA2, CHD7, C11ORF9, B3GNT5, LHX1, BAI1, MSI1, GPSM1, GBX2, APBA2, POU3F2, NEFM, SIM2, RFX4, MAP1B, FOXA1, FZD3, DOCK7, NTN1, PCDH18, CDKN1C, SHOX2, HOXB3, EPHA4, DLX2, DLX1, HOXB2, SEMA6C, DRP2, ULK2, ZIC5, NTRK2, ID3, LRP2, CHRD, GFRA2 | 95    | 2.30E-21 | 8.20E-19  |
| Neurogenesis (GO:0022008)                                          | NRP2, FOXA2, JAG1, PAX3, PAX2, WNT1, S1PR1, LGI4, UNC5C, SEMA3A, NR2F2, TWIST1, NR2F1, SOX10, SATB2, EGR2, EFN1, CDK6, SLITRK1, BTG2, CCND2, NAB1, SIX1, EFNA5, SLITRK5, SOX1, ONECUT2, SOX5, CDH2, EPHB3, CDH4, TTC3, SEMA5A, HOXA2, C11ORF9, LHX1, BAI1, GBX2, POU3F2, NEFM, FOXA1, MAP1B, DOCK7, NTN1, CDKN1C, DLX2, EPHA4, DLX1, SEMA6C, ULK2, NTRK2, ID3                                                                                                                                                                                                                                                                                                | 52    | 2.20E-11 | 2.30E-09  |
| Generation of neurons (GO:0048699)                                 | NRP2, FOXA2, SOX1, ONECUT2, SOX5, PAX3, JAG1, CDH2, EPHB3, PAX2, CDH4, TTC3, SEMA5A, WNT1, HOXA2, S1PR1, LHX1, BAI1, GBX2, LGI4, POU3F2, UNC5C, SEMA3A, NR2F2, NEFM, TWIST1, NR2F1, SATB2, EGR2, EFN1, MAP1B, FOXA1, DOCK7, NTN1, CDKN1C, SLITRK1, DLX2, EPHA4, DLX1, SEMA6C, BTG2, CCND2, ULK2, NTRK2, SIX1, EFNA5, ID3, SLITRK5                                                                                                                                                                                                                                                                                                                            | 48    | 1.90E-10 | 1.80E-08  |
| Neuron differentiation (GO:0030182)                                | NRP2, SOX1, FOXA2, ONECUT2, SOX5, PAX3, JAG1, EPHB3, PAX2, CDH4, SEMA5A, WNT1, HOXA2, S1PR1, LHX1, BAI1, GBX2, LGI4, POU3F2, UNC5C, SEMA3A, EGR2, EFN1, MAP1B, FOXA1, DOCK7, NTN1, CDKN1C, SLITRK1, DLX2, EPHA4, DLX1, SEMA6C, BTG2, ULK2, NTRK2, EFNA5, ID3, SLITRK5                                                                                                                                                                                                                                                                                                                                                                                        | 39    | 5.10E-09 | 3.90E-07  |
| Central nervous system development (GO:0007417)                    | SOX1, FOXA2, SOX5, ZEB2, PAX3, ZBTB16, ZEB1, EPHB3, TAGLN3, ZIC2, WNT1, HOXA2, CHD7, S1PR1, B3GNT5, C11ORF9, LHX1, GBX2, POU3F2, UNC5C, NR2F2, NR2F1, SOX10, EGR2, RFX4, MAP1B, EOMES, MECOM, PCDH18, DLX2, DLX1, HOXB2, MSX1, DRP2, ZIC5, EFNA5, LRP2, CHRD                                                                                                                                                                                                                                                                                                                                                                                                 | 38    | 7.40E-09 | 4.70E-07  |
| Peripheral nervous system development (GO:0007422)                 | SOX10, EDNRB, GSTM3, EGR3, EGR2, BAI1, NAB1, ONECUT2, POU3F2, PMP22                                                                                                                                                                                                                                                                                                                                                                                                                                                                                                                                                                                          | 10    | 7.40E-09 | 4.70E-07  |
| Axonogenesis (GO:0007409)                                          | NRP2, EGR2, EFN1, MAP1B, DOCK7, PAX2, EPHB3, CDH4, NTN1, SEMA5A, SLITRK1, EPHA4, HOXA2, SEMA6C, ULK2, BAI1, GBX2, EFNA5, SEMA3A, UNC5C, SLITRK5                                                                                                                                                                                                                                                                                                                                                                                                                                                                                                              | 21    | 8.90E-07 | 3.80E-05  |
| Brain development (GO:0007420)                                     | SOX1, FOXA2, ZEB2, ZIC2, WNT1, HOXA2, S1PR1, LHX1, GBX2, POU3F2, UNC5C, NR2F2, NR2F1, EGR2, RFX4, EOMES, MECOM, PCDH18, DLX2, DLX1, MSX1, HOXB2, ZIC5, EFNA5, LRP2, CHRD                                                                                                                                                                                                                                                                                                                                                                                                                                                                                     | 26    | 2.40E-06 | 8.00E-05  |
| Cell morphogenesis involved in neuron differentiation (GO:0048667) | NRP2, EGR2, EFN1, MAP1B, DOCK7, PAX2, EPHB3, CDH4, NTN1, SEMA5A, SLITRK1, EPHA4, HOXA2, SEMA6C, ULK2, BAI1, GBX2, EFNA5, SEMA3A, UNC5C, SLITRK5                                                                                                                                                                                                                                                                                                                                                                                                                                                                                                              | 21    | 5.60E-06 | 1.60E-04  |
| Neuron projection morphogenesis (GO:0048812)                       | NRP2, EGR2, EFN1, MAP1B, DOCK7, PAX2, EPHB3, CDH4, NTN1, SEMA5A, SLITRK1, EPHA4, HOXA2, SEMA6C, ULK2, BAI1, GBX2, EFNA5, SEMA3A, UNC5C, SLITRK5                                                                                                                                                                                                                                                                                                                                                                                                                                                                                                              | 21    | 7.40E-06 | 2.00E-04  |
| Axon guidance (GO:0007411)                                         | NRP2, EGR2, EFN1, EPHB3, NTN1, CDH4, SEMA5A, EPHA4, HOXA2, SEMA6C, GBX2, EFNA5, SEMA3A, UNC5C                                                                                                                                                                                                                                                                                                                                                                                                                                                                                                                                                                | 14    | 2.00E-05 | 4.70E-04  |
| Neural tube development (GO:0021915)                               | RGMA, WNT1, FOXA2, ZIC5, GBX2, FZD3, ZEB2, PAX3, CHRD, ZIC2, TWIST1                                                                                                                                                                                                                                                                                                                                                                                                                                                                                                                                                                                          | 11    | 3.50E-05 | 6.90E-04  |
| Neuron development (GO:0048666)                                    | NRP2, SOX1, ONECUT2, EPHB3, PAX2, CDH4, SEMA5A, HOXA2, BAI1, GBX2, LGI4, SEMA3A, UNC5C, EGR2, EFN1, MAP1B, DOCK7, NTN1, CDKN1C, SLITRK1, EPHA4, SEMA6C, ULK2, NTRK2, EFNA5, SLITRK5                                                                                                                                                                                                                                                                                                                                                                                                                                                                          | 26    | 3.80E-05 | 6.90E-04  |
| Neural crest cell development (GO:0014032)                         | NRP2, EDNRA, EDNRB, EFN1, GBX2, ZEB2, PAX3, SOX9                                                                                                                                                                                                                                                                                                                                                                                                                                                                                                                                                                                                             | 8     | 4.80E-05 | 9.00E-04  |
| Neural crest cell differentiation (GO:0014033)                     | NRP2, EDNRA, EDNRB, EFN1, GBX2, ZEB2, PAX3, SOX9                                                                                                                                                                                                                                                                                                                                                                                                                                                                                                                                                                                                             | 8     | 4.80E-05 | 9.00E-04  |
| Regulation of neuron differentiation (GO:0045664)                  | FOXA2, FOXA1, MAP1B, SOX5, CDH2, NTN1, CDH4, TTC3, HOXA2, CCND2, SIX1, NTRK2, POU3F2, SEMA3A, NEFM                                                                                                                                                                                                                                                                                                                                                                                                                                                                                                                                                           | 15    | 5.00E-05 | 9.30E-04  |
| Neuron projection development (GO:0031175)                         | NRP2, EGR2, EFN1, MAP1B, DOCK7, PAX2, EPHB3, CDH4, NTN1, SEMA5A, SLITRK1, EPHA4, HOXA2, SEMA6C, ULK2, BAI1, GBX2, EFNA5, SEMA3A, UNC5C, SLITRK5                                                                                                                                                                                                                                                                                                                                                                                                                                                                                                              | 21    | 1.00E-04 | 1.90E-04  |
| Forebrain development (GO:0030900)                                 | RFX4, SOX1, ZEB2, MECOM, WNT1, DLX2, DLX1, MSX1, LHX1, ZIC5, POU3F2, LRP2, NR2F2, CHRD, NR2F1                                                                                                                                                                                                                                                                                                                                                                                                                                                                                                                                                                | 15    | 2.10E-04 | 3.50E-03  |
| Neural crest cell migration (GO:0001755)                           | NRP2, EDNRB, EFN1, GBX2, ZEB2, PAX3                                                                                                                                                                                                                                                                                                                                                                                                                                                                                                                                                                                                                          | 6     | 5.30E-04 | 7.90E-03  |

### Supporting Information Fig 3. Heat map of the normalized gene expression values in Twin-DS-iPSCs and Twin-N-iPSCs for the 96 downregulated genes involved in brain-related functions.

(A) Samples (columns) and genes (rows) are sorted according to hierarchical clustering based on normalized and z-transformed gene expression values. A negative z-score (in red) indicates low expression (below the mean) whereas a positive z-score (in green) shows high expression (above the mean). (B) The table lists the brain-related functions associated with these 96 downregulated genes.
