# Supplementary material for: Modelling and rescuing neurodevelopmental defect of Down syndrome using induced pluripotent stem cells from monozygotic twins discordant for trisomy 21
Source: PubMed Central journal article supplement (PMC3927959; doi:10.1002/emmm.201302848), 2013-12-27
Supplement: emmm0006-0259-sd13.pdf [file emmm0006-0259-sd13.pdf]

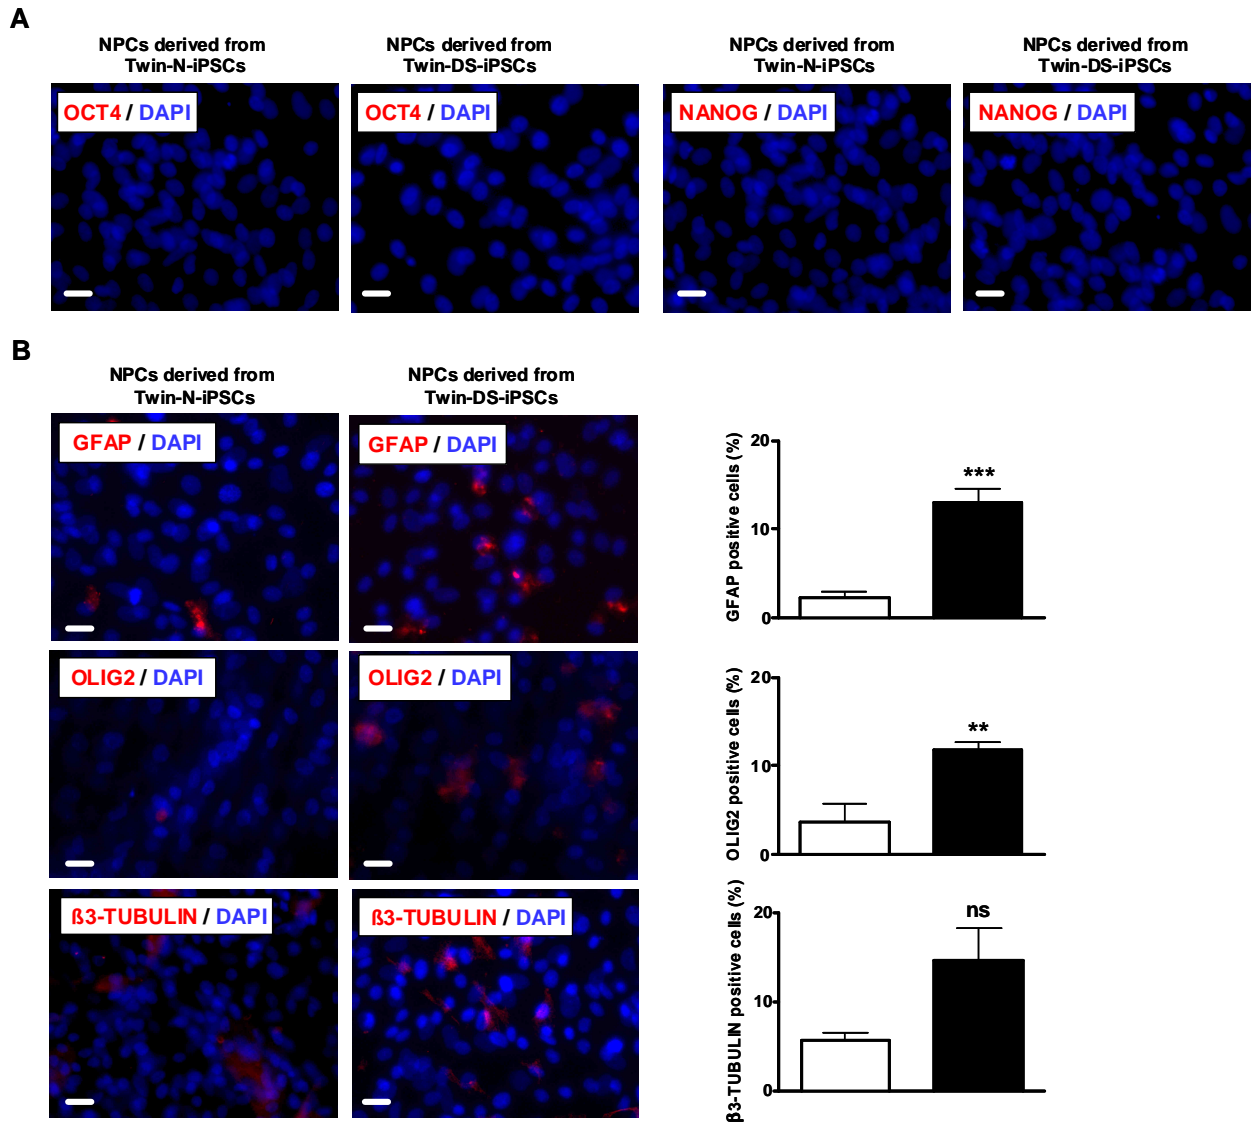

**Supporting Information Fig 5. Proportion of each cell type in neurospheres derived from Twin-N-iPSCs and Twin-DS-iPSCs upon neural induction**

(A) Immunofluorescence staining of cells derived from Twin-N-iPSCs and Twin-DS-iPSCs upon neural induction for the pluripotency markers OCT4 and NANOG. (B) Proportion of GFAP<sup>+</sup> cells, OLIG2<sup>+</sup> cells and β3-TUBULIN<sup>+</sup> cells upon neural induction of Twin-N-iPSCs and Twin-DS-iPSCs. Scale bar corresponds to 10 μm. Data are represented as mean ± SEM. Ns non significant, \*\* p < 0.01, \*\*\* p < 0.001 by Student's *t*-test from n = 4.
