# Supplementary material for: Modelling and rescuing neurodevelopmental defect of Down syndrome using induced pluripotent stem cells from monozygotic twins discordant for trisomy 21
Source: PubMed Central journal article supplement (PMC3927959; doi:10.1002/emmm.201302848), 2013-12-27
Supplement: emmm0006-0259-sd15.pdf [file emmm0006-0259-sd15.pdf]

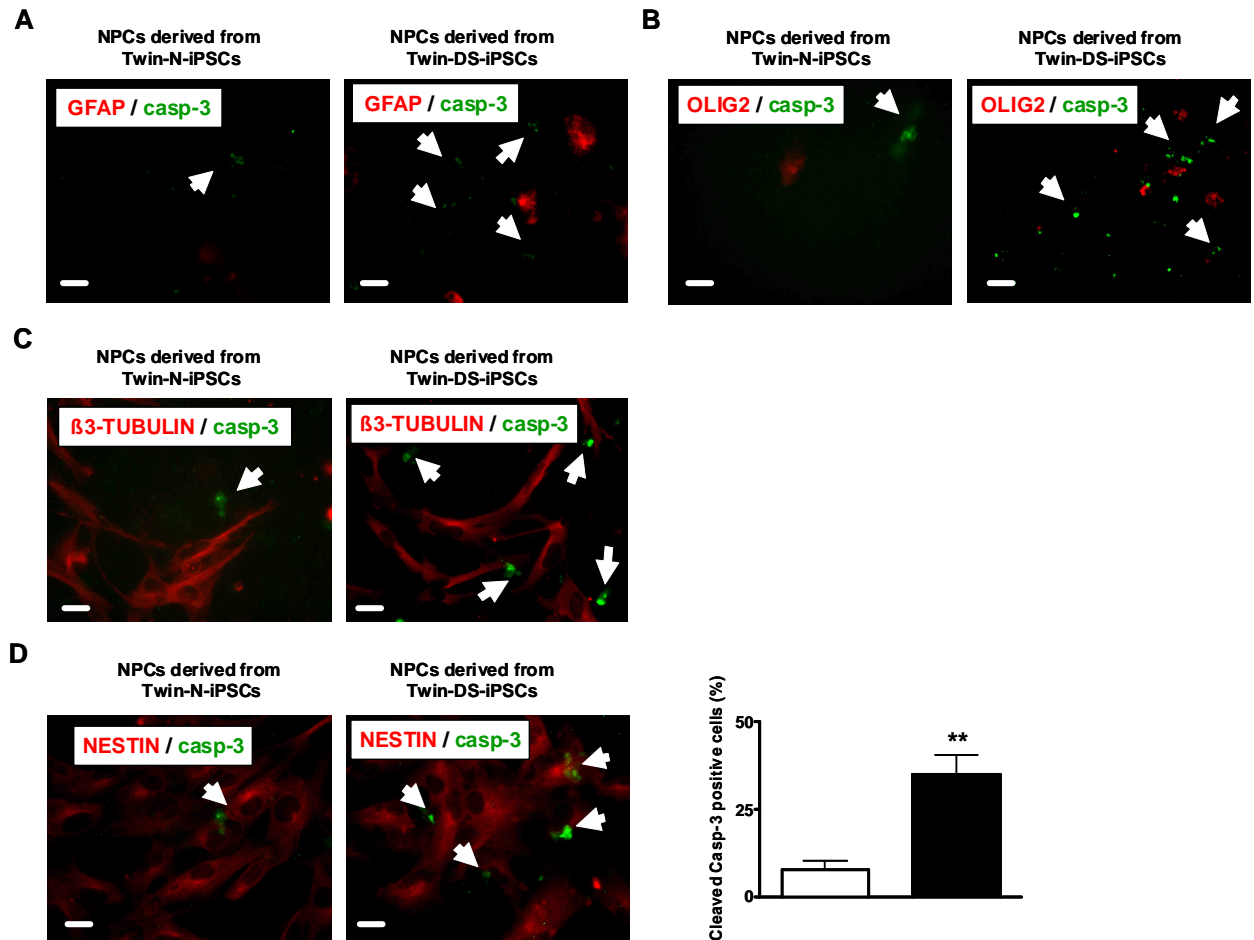

**Supporting Information Fig 7. Apoptotic properties of each cell type in neurospheres derived from Twin-N-iPSCs and Twin-DS-iPSCs upon neural induction.**

(A-D) Representative images of each cell type of neurospheres derived from Twin-N-iPSCs and Twin-DS-iPSCs co-stained with GFAP (in A), OLIG2 (in B),  $\beta$ 3-TUBULIN (in C), NESTIN (in D) and cleaved caspase-3 (arrows) antibodies. GFAP<sup>+</sup> cells (in A), OLIG2<sup>+</sup> cells (in B),  $\beta$ 3-TUBULIN<sup>+</sup> cells (in C) were negative for cleaved caspase-3 staining. (D) Proportion of cleaved caspase-3<sup>+</sup> cells among NESTIN<sup>+</sup> cells in neurospheres derived from Twin-N-iPSCs and Twin-DS-iPSCs (in D). Scale bar corresponds to 10  $\mu$ m. Data are represented as mean  $\pm$  SEM. \*\*  $p < 0.01$  by Student's  $t$ -test from  $n = 4$ .
