# Supplementary material for: Modelling and rescuing neurodevelopmental defect of Down syndrome using induced pluripotent stem cells from monozygotic twins discordant for trisomy 21
Source: PubMed Central journal article supplement (PMC3927959; doi:10.1002/emmm.201302848), 2013-12-27
Supplement: emmm0006-0259-sd16.pdf [file emmm0006-0259-sd16.pdf]

**A**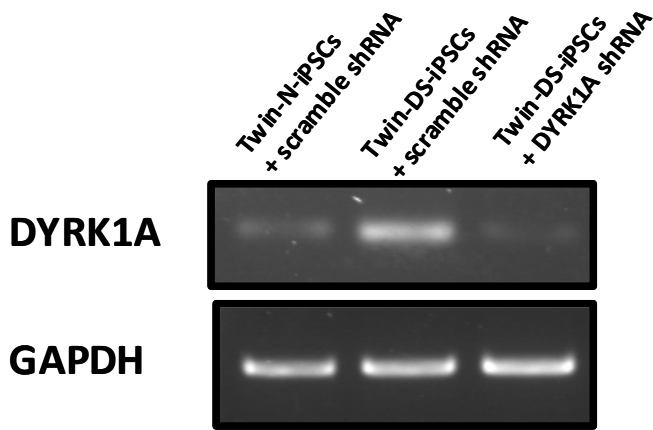**B**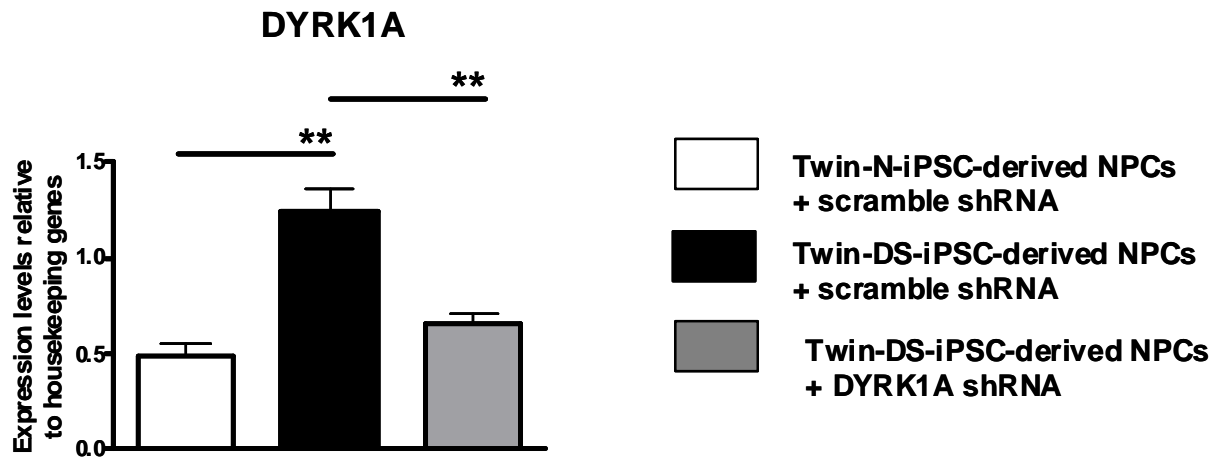

**Supporting Information Fig 8. Knockdown efficiencies of DYRK1A shRNA in NPCs derived from Twin-DS-iPSCs.**

(A) Non quantitative RT-PCR showing knockdown efficiencies of DYRK1A shRNA in Twin-DS-iPSCs. (B) Quantitative RT-PCR showing knockdown efficiencies of DYRK1A shRNA in NPCs derived from Twin-DS-iPSCs. Data are represented as mean  $\pm$  SEM. \*\*  $p < 0.01$  by one-way ANOVA followed with Tukey's post hoc test from  $n = 4$ .
