# Supplementary material for: Modelling and rescuing neurodevelopmental defect of Down syndrome using induced pluripotent stem cells from monozygotic twins discordant for trisomy 21
Source: PubMed Central journal article supplement (PMC3927959; doi:10.1002/emmm.201302848), 2013-12-27
Supplement: emmm0006-0259-sd17.pdf [file emmm0006-0259-sd17.pdf]

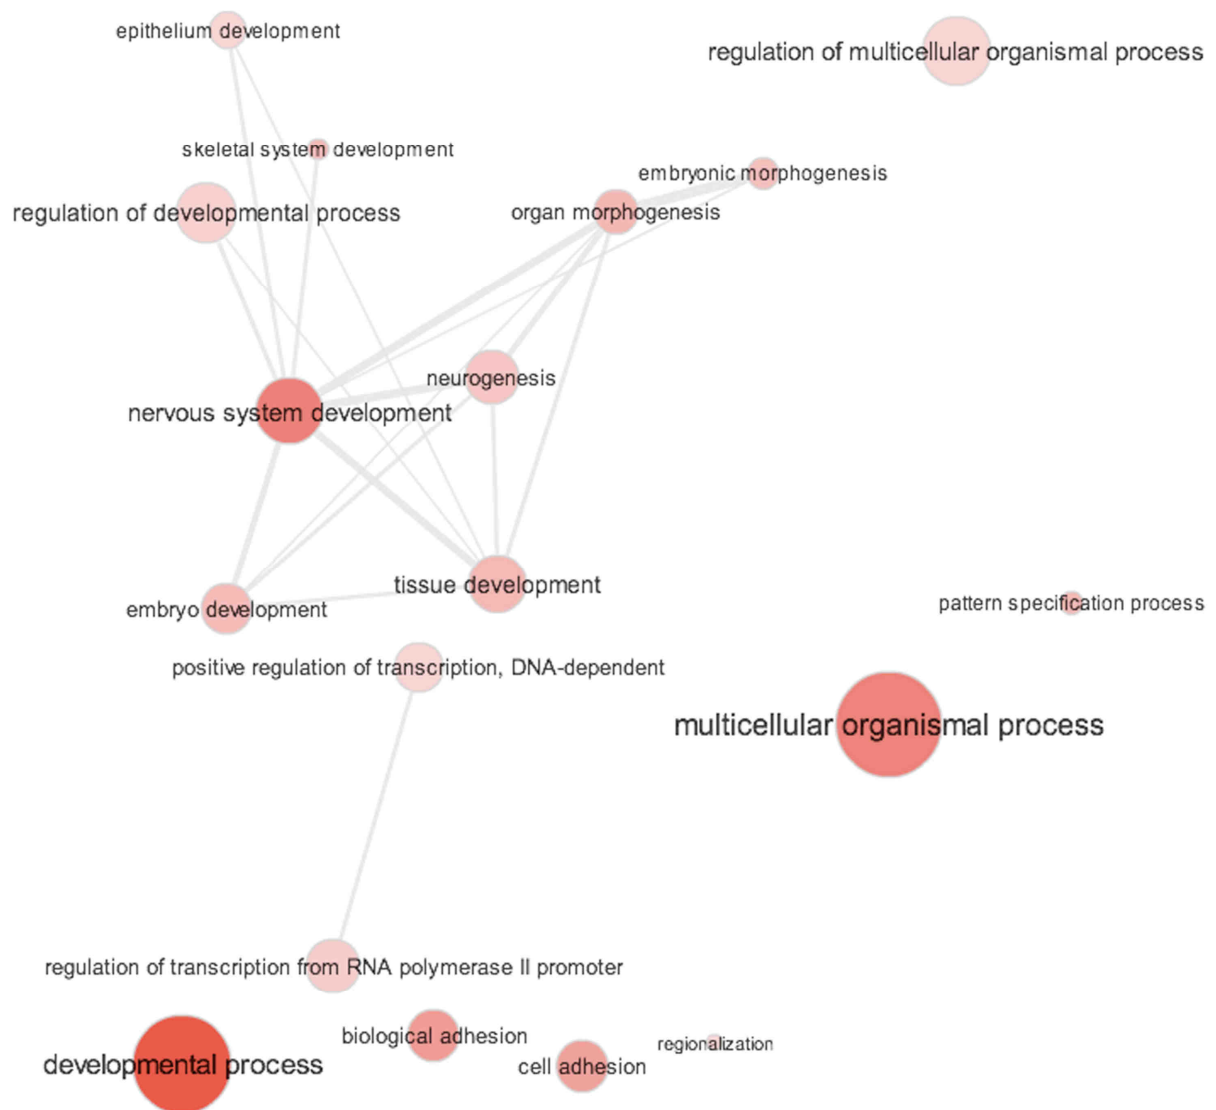

**Supporting Information Fig 9. REVIGO interactive graph of the top biological processes associated with the 580 downregulated genes.**

The node size represents the frequency of the GO term in the human database and the color shows the p-value associated with each term (dark red for small p-values).
