# Supplementary material for: Modelling and rescuing neurodevelopmental defect of Down syndrome using induced pluripotent stem cells from monozygotic twins discordant for trisomy 21
Source: PubMed Central journal article supplement (PMC3927959; doi:10.1002/emmm.201302848), 2013-12-27
Supplement: emmm0006-0259-sd18.pdf [file emmm0006-0259-sd18.pdf]

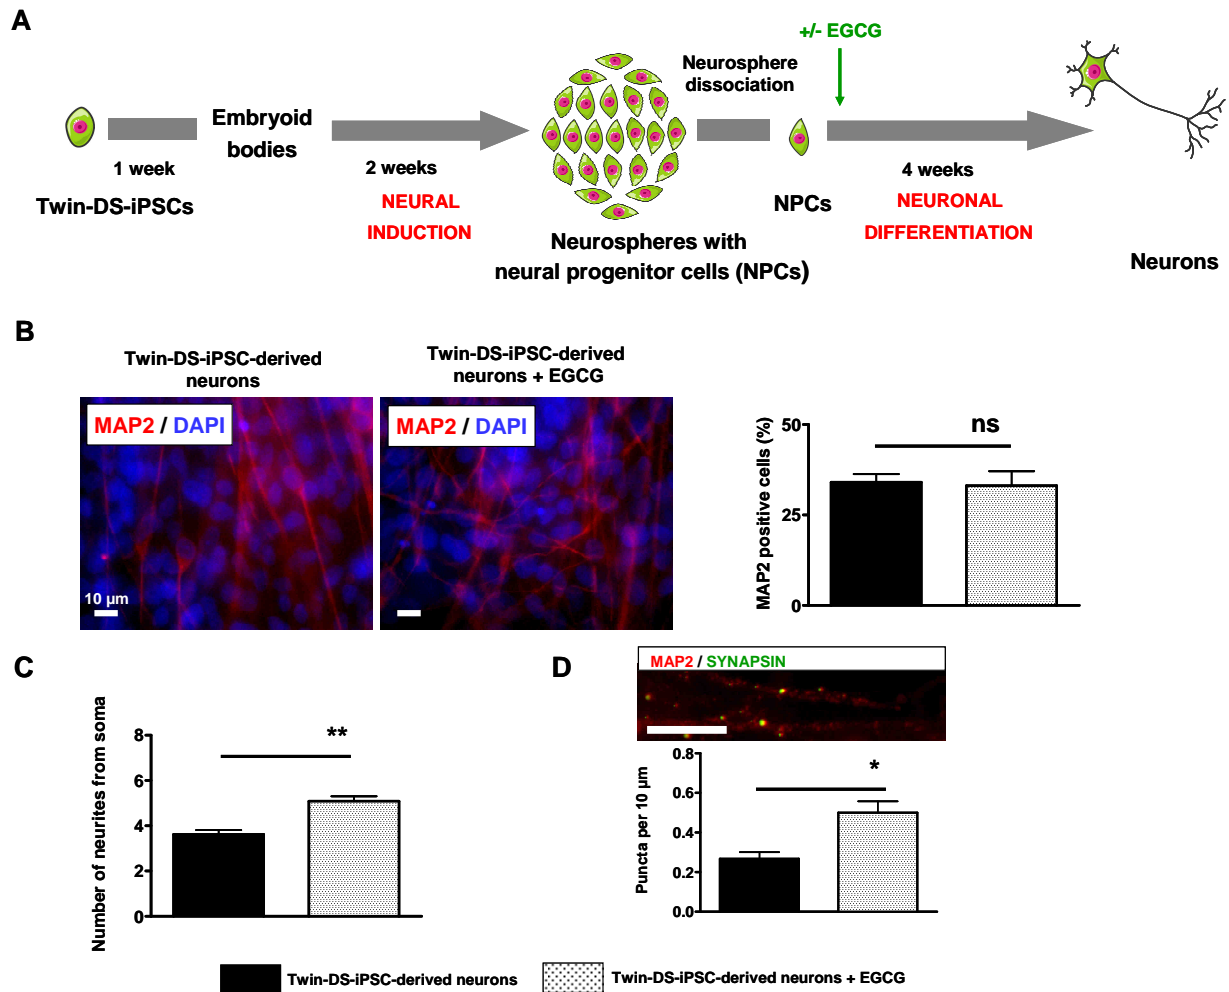

### Supporting Information Fig 10. Additional effects of a delayed targeting of DYRK1A through EGCG on neurons derived from Twin-DS-iPSCs

(A) Schematic representation for generation of neurons from Twin-DS-iPSCs after a delayed targeting of DYRK1A through EGCG 10  $\mu$ M. (B) Proportion of MAP2 positive cells after neuronal differentiation of Twin-DS-iPSC-derived NPCs. (C) Increased number of neurites from soma of neurons derived from Twin-DS-iPSCs upon EGCG treatment. (D) Representative image of SYNAPSIN I punctae in MAP2<sup>+</sup> dendrites. Reduced density of SYNAPSIN punctae in neurons derived from Twin-DS-iPSCs. Data are represented as mean  $\pm$  SEM. Ns non significant, \*  $p < 0.05$ , \*\*  $p < 0.01$  by Student's *t*-test from  $n = 3-4$ .
