# Supplementary material for: Modelling and rescuing neurodevelopmental defect of Down syndrome using induced pluripotent stem cells from monozygotic twins discordant for trisomy 21
Source: PubMed Central journal article supplement (PMC3927959; doi:10.1002/emmm.201302848), 2013-12-27
Supplement: emmm0006-0259-sd19.pdf [file emmm0006-0259-sd19.pdf]

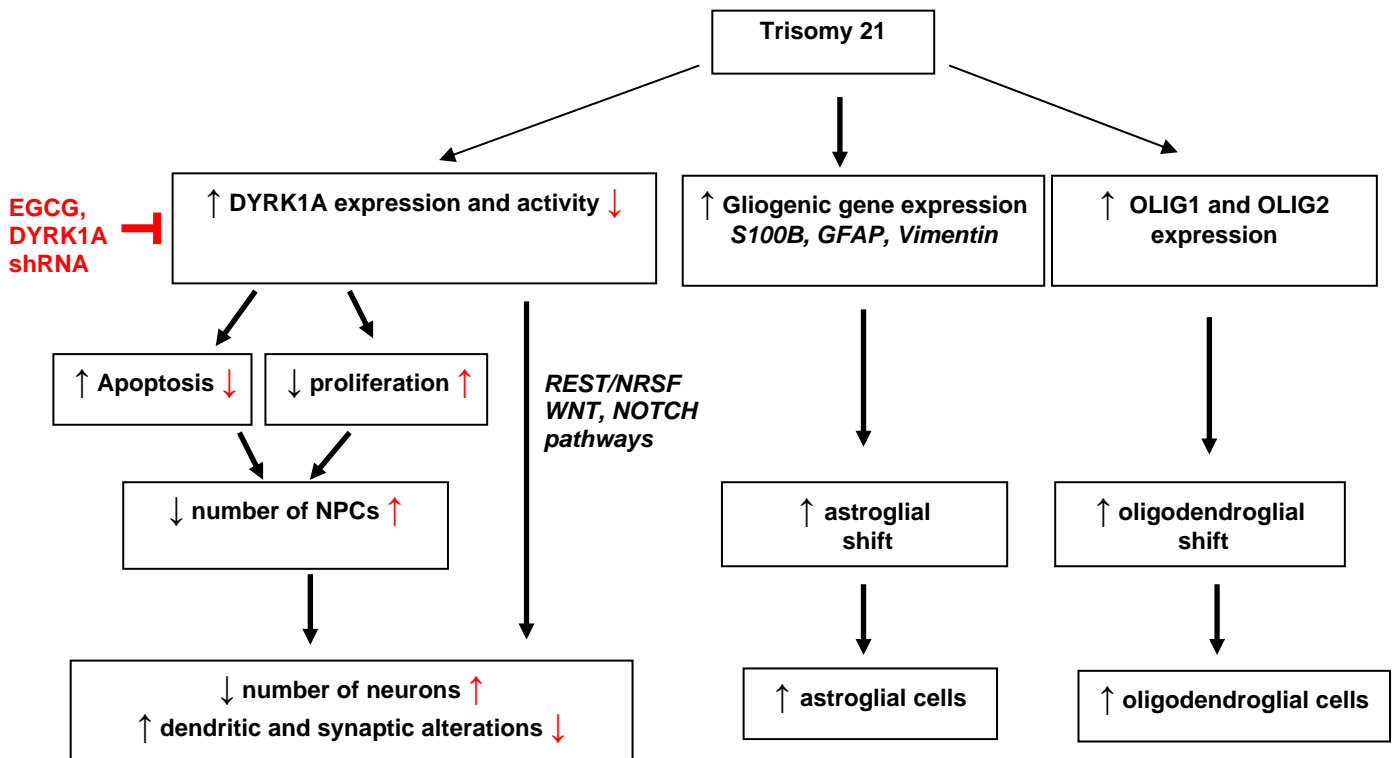

### Supporting Information Fig 11. Proposed mechanisms responsible for the abnormal neuronal differentiation of Twin-DS-iPSCs.

In DS, the extra copy of HSA21 leads to the overexpression of HSA21 gene such as *DYRK1A*, *S100B*, *OLIG1* and *OLIG2*. Here, we proposed that a possible mechanism for the abnormal neuronal differentiation of Twin-DS-iPSCs is related to *DYRK1A*. The increased expression and activity of *DYRK1A* in NPCs derived from Twin-DS-iPSCs lead to an increase of cell apoptosis and a decrease of cell proliferation contributing to a reduced number of these cells. Moreover, upon neuronal differentiation, Twin-DS-iPSCs exhibited a reduced number of neurons and an increase of astroglial and oligodendroglial cells compared to Twin-N-iPSCs. In line with this, neurons derived from Twin-DS-iPSCs showed dendritic and synaptic alterations. Importantly, *DYRK1A* inhibition through EGCG treatment and shRNA silencing corrected these defects. Genes and pathways involved in neural fate and differentiation such as *REST/NRSF*, *WNT* and *NOTCH* likely underlie *DYRK1A* correction (→: stimulation; ⊥: inhibition).
